# Supplementary material for: An ultralight, elastic, cost-effective, and highly recyclable superabsorbent from microfibrillated cellulose fibers for oil spillage cleanup
Source: Royal Society of Chemistry journal article supplement (doi:10.1039/c4ta07057g), 2015-01-01
Supplement: c4ta07057g1.pdf [file c4ta07057g1.pdf]

## **Electronic Supplementary Information**

### **Ultralight, Elastic, Cost-effective and Highly Recyclable Superabsorbent from Microfibrillated Cellulose Fiber for Oil Spillage Cleanup**

Sha Wang<sup>a</sup>, Xinwen Peng<sup>a</sup>, Linxin Zhong<sup>\*,a</sup>, Jiewen Tan<sup>a</sup>, Shuangshuang Jing<sup>a</sup>,  
Xuefei Cao<sup>a</sup>, Wei Chen<sup>a</sup>, Chuanfu Liu<sup>a</sup>, Runcang Sun<sup>\*,a,b</sup>

<sup>a</sup> State Key Laboratory of Pulp and Paper Engineering, South China University of  
Technology, Guangzhou 510640, China

<sup>b</sup> Beijing Key Laboratory of Lignocellulosic Chemistry, Beijing Forestry University,  
Beijing 100083, China

(Linxin Zhong) E-mail address: [lxzhong0611@scut.edu.cn](mailto:lxzhong0611@scut.edu.cn).

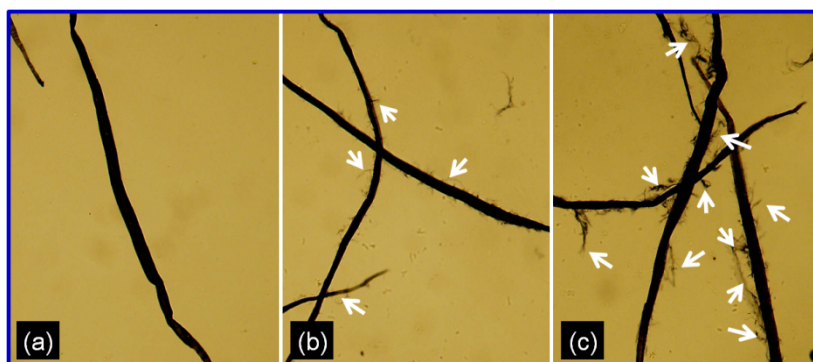

Figure S1. Optical microscope photographs of a) MCF0, b) MCF3000, and c) MCF6000.

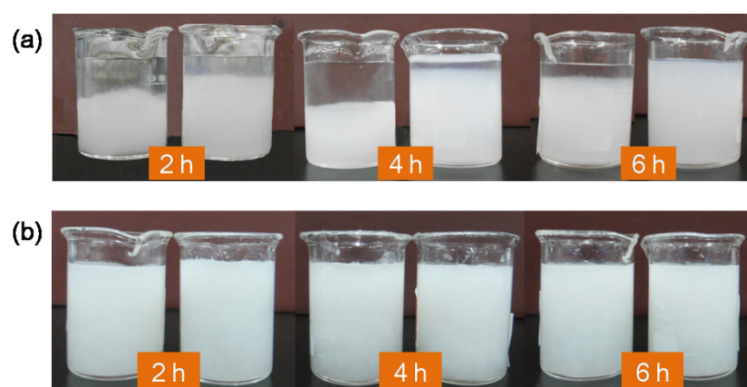

Figure S2. Snapshots of cellulose fiber suspensions with concentrations of a) 0.5% and b) 2.0%. The left one of each two beakers represented MPF0, and the right one was MPF6000.

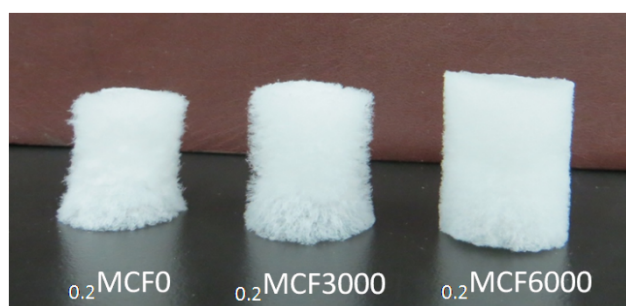

Figure S3. The morphology comparison of MCF sponges with different microfibrillation degree.

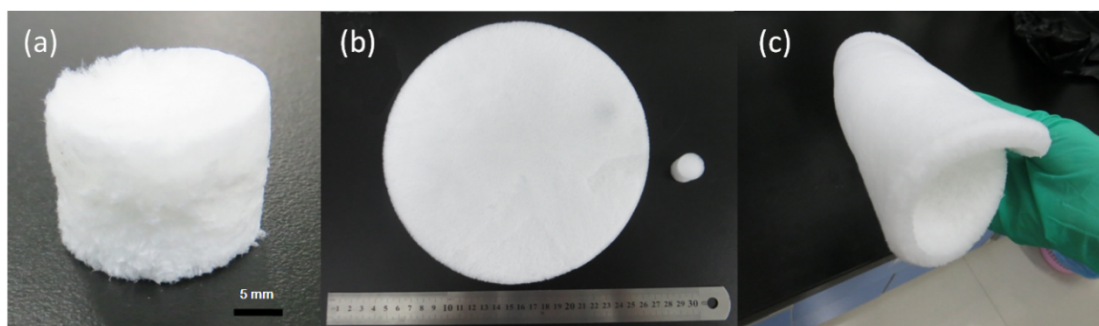

Figure S4. Photographs of  $_{0.2}\text{MCF6000}$  sponges: a) small scale, b) large scale, and c) flexibility demonstration of sponge.

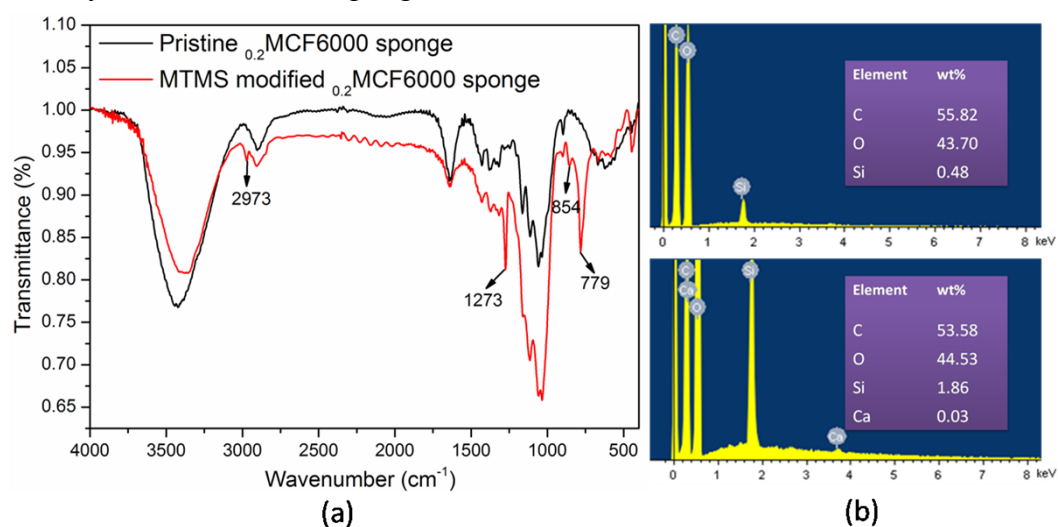

Figure S5. FTIR spectra of MTMS modified  $_{0.2}\text{MCF6000}$  sponges (a) and the EDS spectrum of pristine  $_{0.2}\text{MCF6000}$  sponge (b, top) and hydrophobic  $_{0.2}\text{MCF6000}$  sample (b, bottom).
